# Supplementary material for: Proof systems for planning under 0-approximation semantics
Source: Springer Nature journal article supplement (doi:10.1007/s11432-013-4854-1), 2014-01-08
Supplement: 11432_2013_4854_MOESM1_ESM.pdf [file 11432_2013_4854_MOESM1_ESM.pdf]

中文题目：零逼近语义下的规划证明系统

关键词：霍尔证明系统，离线规划，规划生成，规划验证，自动推理

创新点：本文为不完全信息下的规划问题设计了相关的霍尔证明系统。这些证明系统为零逼近规划语义提供了规划生成与验证的推理功能且具有可靠性和完全性。此外，这些证明系统可为复杂的规划问题预先离线形成较小的规划库，再通过组合规则在线生成完整的规划方案。从计算复杂性角度上看，这是一种以空间换取时间的计算策略，我们认为这种思路可应用于一般的规划问题求解。
